# Supplementary material for: A roundabout strategy for high-purity glycolic acid biopreparation via a resting cell bio-oxidation catalysis of ethylene glycol
Source: Royal Society of Chemistry journal article supplement (doi:10.1039/d2gc00969b), 2022-01-01

Fig. 1: The NMR spectra of the standard sample (green), 4<sup>th</sup> recrystallization CG (red), and 3<sup>rd</sup> recrystallization CG (blue) are shown from top to bottom.

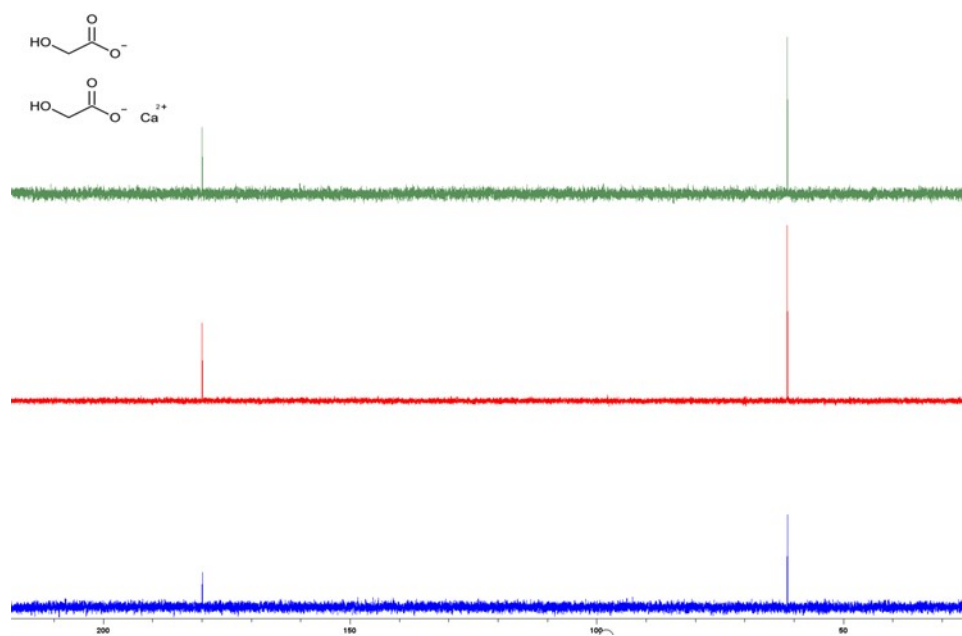

Supplement: d2gc00969b1.pdf [file d2gc00969b1.pdf]
